# Supplementary material for: Chitinase 1 regulates pulmonary fibrosis by modulating TGF-β/SMAD7 pathway via TGFBRAP1 and FOXO3
Source: PubMed Central journal article supplement (PMC6516052; doi:10.26508/lsa.201900350), 2019-05-13
Supplement: LSA-2019-00350_TableS1.pdf [file LSA-2019-00350_TableS1.pdf]

# **Chitinase1 Regulates Pulmonary Fibrosis by Modulating TGF- $\beta$ /SMAD7 Pathway via TGFBRAP1 and FOXO3**

Chang-Min Lee<sup>1</sup>, Jin Wook Park<sup>1</sup>, Jae Hyun Lee<sup>2</sup>, Emily Chen<sup>1</sup>, Suchita Kamle<sup>1</sup>, Bing Ma<sup>1</sup>, Bedia Akosman<sup>1</sup>, Roberto Cotez<sup>1</sup>, Chuan-Hua He<sup>1</sup>, Yang Zhou<sup>1</sup>, Erica L. Herzog<sup>3</sup>, Changwan Ryu<sup>2</sup>, Xueyan Peng<sup>2</sup>, Ivan O. Rosas<sup>4</sup>, Sergio Poli<sup>4</sup>, Carol Feghali Bostwick<sup>5</sup>, Augustine M. Choi<sup>6</sup>, Jack A. Elias<sup>1,7,\*</sup>, and Chun Geun Lee<sup>1,\*</sup>

## **List of Supplementary Materials**

Table S1. CHIT1 interacting proteins detected by Yeast-2 Hybrid analysis

Table S2. Demographic feature of IPF patients and controls used in this study

Table S3. Baseline demographics of a patient cohort and controls used to isolate AEC type 1 and type 2 cells

Table S4. Demographic feature of SSc patients and controls used in this study

Fig. S1. FOXO3 siRNA silencing efficacy on NHLF cells.

Fig. S2. Generation of deletion mutant of FOXO consensus sequence.

Fig. S3. Expression levels of CHIT1 and Smad7 in the lung epithelial cells from the patients with IPF and controls.

Fig. S4. Intracellular localization of Chit1 expression in the bleomycin-stimulated lung.

## Supplementary Tables

**Table S1:** Chit1 interacting proteins detected by Yeast Two Hybrid analysis.

| <b>Bait</b> | <b>Potential interacting proteins</b>                                    |
|-------------|--------------------------------------------------------------------------|
| CHIT1       | SNAP-associated protein (SNAPIN)                                         |
|             | Ferritin Light Polypeptide (FTL)                                         |
|             | Forkhead Box O3 (FOXO3)                                                  |
|             | Transforming Growth Factor beta Receptor Associated Protein 1 (TGFBRAP1) |
|             | Zyxin (ZYG)                                                              |
|             | Mitogen-Activated Protein Kinase Kinase 2 (MAP2K2)                       |

**Table S2.** Baseline demographics IPF and controls used in this study.

|                                | IPF        | Control  |
|--------------------------------|------------|----------|
| <i>N</i>                       | 17         | 19       |
| <i>Sex:</i>                    |            |          |
| Male                           | 9          | 14       |
| Female                         | 8          | 4        |
| <i>Age:</i>                    |            |          |
| Mean±SD                        | 65.54±5.5  | 43.05±14 |
| <i>Race</i>                    |            |          |
| <i>Ethnicity:</i>              |            |          |
| Caucasian                      | 17         | 19       |
| <i>Smoking:</i>                |            |          |
| Never                          | 9          | 14       |
| Ever                           | 8          | 4        |
| <i>Spirometry (Mean±SD):</i>   |            | N/A      |
| FEV1(%)                        | 52.94±11.5 |          |
| FVC(%)                         | 47.47±12.4 |          |
| FEV1/FVC                       | 87.8±6     |          |
| TLC (%)                        | 50.53±12.4 |          |
| IC(%)                          | 41±10.5    |          |
| FRC(%)                         | 59.2±18    |          |
| RV (%)                         | 54±27      |          |
| <i>DLCO(%)</i>                 | 29±7.5     | N/A      |
| <i>Cardiac Catheterization</i> |            | N/A      |
| <i>(Mean±SD):</i>              |            |          |
| PAP                            | 25.4±8.3   |          |
| PCWP                           | 9.76±3.01  |          |
| Mean RA                        | 5.5±2.52   |          |
| CO(l/m)                        | 5.97±0.8   |          |

N/A, not available

**Table S3.** Baseline demographics of patient cohort that was used to isolate AEC type 1 and type 2 isolated cells.

|                                         | IPF  | Control |
|-----------------------------------------|------|---------|
| <i>N</i>                                | 10   | 10      |
| <i>Sex:</i>                             |      |         |
| Male                                    | 8    | 9       |
| Female                                  | 2    | 1       |
| <i>Age:</i>                             |      |         |
| Mean                                    | 64.5 | 44.5    |
| <i>Ethnicity:</i>                       |      |         |
| Caucasian                               | 10   | 10      |
| <i>Smoking:</i>                         |      |         |
| Never                                   | 4    | 8       |
| Ever                                    | 6    | 2       |
| <i>Spirometry (Mean):</i>               |      |         |
| FVC                                     | 47   | N/A     |
| FEV1/FVC                                | 109  |         |
| TLC                                     | 45.3 |         |
| FRC                                     | 50.1 |         |
| <i>DLCO adjusted:</i>                   |      |         |
| Mean                                    | 26.8 | N/A     |
| <i>Cardiac Catheterization (Means):</i> |      |         |
| PAP                                     | 25.6 | N/A     |
| PCWP                                    | 10.7 |         |

N/A, not available

**Table S4:** Demographic feature of scleroderma (SSc) patients used in this study.

|                                  | Chit1 activity (above median) | p-value   |
|----------------------------------|-------------------------------|-----------|
| <i>N</i>                         | 28                            |           |
| Sex: n(%)                        |                               | 0.7516    |
| Male                             | 7(17.65)                      |           |
| Female                           | 21(82.35)                     |           |
| <i>Age_at_Blood_Draw:</i>        |                               | 0.002519  |
| Mean $\pm$ SD                    | 58.99 $\pm$ 10.09             |           |
| <i>Ethnicity: n(%)</i>           |                               | 0.4257    |
| Caucasian                        | 21(75.00)                     |           |
| African American                 | 5(17.86)                      |           |
| Asian                            | 0(0)                          |           |
| Latino                           | 2(7.14)                       |           |
| <i>Smoking: n(%)</i>             |                               | 0.0002253 |
| Never                            | 14(14.28)                     |           |
| Ever                             | 14(50.00)                     |           |
| Missing                          | 10(35.72)                     |           |
| <i>FVC predicted:</i>            |                               | 0.3865    |
| Mean $\pm$ SD                    | 69.07692 $\pm$ 16.23311       |           |
| <i>DLCO adjusted:</i>            |                               | 0.4155    |
| Mean $\pm$ SD                    | 54.26316 $\pm$ 16.82869       |           |
| <i>SSc type: n(%)</i>            |                               | 0.8363    |
| Diffuse                          | 14(50.00)                     |           |
| Limited                          | 12(42.86)                     |           |
| Sine                             | 2(7.14)                       |           |
| <i>MRSS at entry:</i>            |                               | 0.68      |
| Mean $\pm$ SD                    | 10.11 $\pm$ 6.06              |           |
| <i>GERD (0= no, 1=yes): n(%)</i> |                               | 0.7366    |
| Absent                           | 5(17.86)                      |           |
| Present                          | 23(82.14)                     |           |
| <i>ScI70</i>                     |                               | 0.64      |
| Negative                         | 12 (42.8)                     |           |
| Positive                         | 16 (57.2)                     |           |
